# Supplementary material
Source: publisher figshare collection journal article supplement (https://sage.figshare.com/ndownloader/files/21080937)
Supplement: Supplementary file 1 [file 21080937]

Table S1. The collected samples of Astragali Radix and Hedysari Radix

| Batch | Sample name | Crude drugs |
|-------|-------------|-------------|
| A1    | A1A         | AR          |
|       | A1Pe        | AR          |
|       | A1Ph        | AR          |
|       | A1X         | AR          |
| A2    | A2A         | AR          |
|       | A2Pe        | AR          |
|       | A2Ph        | AR          |
|       | A2X         | AR          |
| A3    | A3A         | AR          |
|       | A3Pe        | AR          |
|       | A3Ph        | AR          |
|       | A3X         | AR          |
| A4    | A4A         | AR          |
|       | A4Pe        | AR          |
|       | A4Ph        | AR          |
|       | A4X         | AR          |
| A5    | A5A         | AR          |
|       | A5Pe        | AR          |
|       | A5Ph        | AR          |
|       | A5X         | AR          |
| A6    | A6A         | AR          |
|       | A6Pe        | AR          |
|       | A6Ph        | AR          |
|       | A6X         | AR          |
| H1    | H1A         | HR          |
|       | H1Pe        | HR          |
|       | H1Ph        | HR          |
|       | H1X         | HR          |
| H2    | H2A         | HR          |
|       | H2Pe        | HR          |
|       | H2Ph        | HR          |
|       | H2X         | HR          |
| H3    | H3A         | HR          |
|       | H3Pe        | HR          |
|       | H3Ph        | HR          |
|       | H3X         | HR          |
| H4    | H4A         | HR          |
|       | H4Pe        | HR          |
|       | H4Ph        | HR          |
|       | H4X         | HR          |

|    |      |    |
|----|------|----|
| H5 | H5A  | HR |
|    | H5Pe | HR |
|    | H5Ph | HR |
|    | H5X  | HR |
| H6 | H6A  | HR |
|    | H6Pe | HR |
|    | H6Ph | HR |
|    | H6X  | HR |

Table S2. Venn ID of compounds in AR and HR shown in venn diagram / [Mass@Rt]

| 139 specific compounds in |                             |                                   |
|---------------------------|-----------------------------|-----------------------------------|
| AR                        | 62 specific compounds in HR | 255 common compounds in AR and HR |
| 976.4645@9.324667         | 960.3231@4.588375           | 980.4669@7.877667                 |
| 958.4519@8.9296665        | 956.4996@6.9031672          | 942.5196@7.8804173                |
| 954.4808@9.330167         | 950.4562@8.184166           | 940.5045@8.48375                  |
| 954.3865@4.471            | 912.5082@8.178333           | 884.2325@1.0612499                |
| 954.3854@4.612143         | 885.3781@5.754333           | 854.2297@1.03925                  |
| 952.4352@8.915999         | 782.2762@5.95775            | 836.1259@1.0985833                |
| 948.4242@8.8801985        | 768.2607@5.3445716          | 832.2919@6.834                    |
| 946.5141@6.7765007        | 723.2873@6.614909           | 828.2454@4.65725                  |
| 946.5141@6.1580005        | 704.2292@4.0653634          | 820.1533@1.1276666                |
| 938.4605@8.918834         | 672.2898@5.409375           | 816.2847@0.8804999                |
| 936.4571@8.921333         | 666.2292@6.6305             | 806.1753@1.0929166                |
| 916.442@7.7673335         | 659.2582@4.5557146          | 804.1773@1.09725                  |
| 910.4246@7.7675           | 651.4039@4.689909           | 798.2753@0.8791666                |
| 890.4652@8.93             | 624.2191@5.2520003          | 796.4619@7.8818336                |
| 868.4817@8.921666         | 598.3873@8.1785             | 796.256@5.45775                   |
| 868.4146@7.209833         | 598.2434@7.5848336          | 774.2853@5.457833                 |
| 858.2558@4.9709997        | 598.1113@8.686501           | 766.2455@5.4716663                |
| 848.4542@8.1455           | 590.1977@4.341857           | 764.1158@1.2311667                |
| 832.4615@8.918834         | 585.2218@5.384333           | 740.266@4.5840836                 |
| 832.292@6.6671815         | 580.1011@7.816833           | 734.2759@3.91725                  |
| 828.2816@5.141834         | 580.1009@8.625667           | 722.1794@1.0737499                |
| 826.4722@7.7941427        | 573.2578@6.5993333          | 719.2763@4.881084                 |
| 826.4717@7.124333         | 564.1062@10.602166          | 706.2087@4.2444167                |
| 824.4519@4.9128337        | 557.2265@5.8786664          | 700.4862@4.9637504                |
| 808.1789@1.2099           | 520.2653@5.81075            | 688.2029@0.93158334               |
| 806.4437@7.2227774        | 516.164@4.641375            | 666.2289@6.4117503                |
| 804.4283@7.187834         | 512.1154@1.0339999          | 666.2226@0.90124995               |
| 792.4624@7.3286667        | 474.1507@4.716444           | 636.2235@0.87899995               |
| 790.4483@8.376143         | 442.1089@2.3939998          | 636.2186@6.509583                 |
| 784.462@6.5141664         | 440.3656@8.170166           | 634.2031@7.0080833                |
| 780.4661@7.8548174        | 440.1091@5.7719             | 620.2239@7.5712495                |

756.4088@9.3275  
738.3985@9.332833  
732.2605@3.8730001  
728.4121@10.589  
718.1725@4.1838336  
704.4109@5.9041667  
704.1937@4.182286  
689.4201@8.921666  
684.3856@9.121715  
674.4013@7.9241424  
674.4012@7.0509996  
670.408@8.919  
662.4013@5.3988338  
662.4013@5.165  
652.3984@8.927167  
646.4088@7.7673335  
644.3905@8.001222  
642.3751@8.068334  
628.3979@7.7565  
614.1821@3.6495454  
601.2143@5.790833  
598.3873@7.848818  
580.1908@3.8911667  
576.0862@4.9570003  
575.2345@5.4805713  
557.1897@4.3754997  
552.1783@8.719144  
550.1685@6.3070006  
548.1532@6.1965003  
548.1167@5.484333  
546.1488@1.0466666  
532.1222@4.976273  
530.074@4.5014997  
512.3474@9.725667  
510.3325@9.754999  
508.3168@10.190572  
488.1323@5.3953333  
476.132@4.5545454  
472.3557@7.195286  
472.3554@8.9972  
468.1732@4.607636  
464.1675@5.8985  
462.153@5.7964997  
462.1166@5.0066667

437.9733@1.2271819  
434.1226@3.7051432  
432.1272@3.8265555  
412.1502@7.8347273  
386.1369@6.6212225  
373.1009@1.7981666  
372.1763@3.8523333  
352.0771@2.6485453  
338.0766@9.591999  
321.2054@2.7976668  
310.0672@2.0543334  
300.0636@8.288428  
294.1218@3.7269  
282.0529@9.142  
270.0529@7.0849996  
267.0967@0.9644545  
261.1844@3.455875  
250.1318@3.7283335  
242.1629@2.3384285  
236.1524@3.4490001  
220.0736@8.392858  
214.1319@0.9789999  
213.0402@3.7664442  
200.1162@1.2151  
187.0636@3.7335715  
176.0473@4.8746367  
145.1101@6.6794553  
145.0528@3.7274284  
143.0737@3.7675  
129.0428@0.90288895  
1102.5577@5.646667

619.3572@10.124917  
608.2234@6.006167  
607.3783@4.5909166  
606.2085@5.9162498  
606.2083@6.611916  
606.2082@6.8451667  
604.1926@7.0645003  
604.1926@6.5968328  
602.1994@4.8769164  
588.14@7.887333  
588.0626@1.2173334  
578.1066@1.231  
575.0919@1.0723332  
572.2452@7.5587497  
572.0902@1.2255  
567.29@7.5519996  
565.4205@4.754  
563.3513@4.493  
560.1281@1.0806667  
556.1573@4.6158338  
556.1128@1.2145001  
555.2109@5.4301667  
554.0763@5.9963336  
543.0648@1.2159168  
542.1767@4.8299165  
541.1955@5.1638336  
540.1461@3.9449167  
526.1503@0.96333337  
516.1271@5.99075  
504.1691@0.92050004  
498.1085@1.0571666  
486.1612@0.93008333  
486.1349@2.889  
484.1194@2.9041665  
481.1775@1.5775  
477.3306@8.374667  
474.1698@0.8791666  
473.211@1.3401667  
473.1663@3.2327502  
472.1372@6.5858326  
460.1376@5.5406666  
457.1793@0.92058325  
452.3365@4.5014167  
450.0996@1.2159168

456.1247@1.995  
454.345@8.932285  
454.3452@7.764666  
454.1089@2.6075  
452.1299@3.5378888  
440.3657@7.8620996  
436.3347@8.921667  
436.3344@9.319166  
426.2603@7.1259995  
418.3242@8.9185  
418.3239@7.7648335  
384.0527@7.9498334  
368.078@7.9581666  
368.0209@6.1689997  
360.2011@4.0232496  
352.2229@7.775778  
346.222@4.1117496  
346.2213@3.840375  
345.2513@5.8437276  
341.1011@3.8044002  
338.0765@5.8074994  
334.2121@8.877334  
334.1757@7.8347  
330.2266@4.801111  
328.033@6.157833  
324.0246@6.1967273  
316.0949@6.969667  
314.1958@4.111143  
302.0644@9.332833  
301.2002@5.3328567  
300.0999@7.960833  
300.0634@7.180092  
298.0482@6.174714  
296.2146@7.7591667  
296.2142@8.921332  
288.1798@2.8633635  
284.1237@4.951364  
284.0686@4.5018573  
268.0738@5.991182  
257.2721@10.23  
216.0637@8.921499  
215.1632@5.4832  
2090.641@0.9724544  
190.0629@7.9936

447.1867@3.4452503  
447.1594@0.8943332  
446.1219@4.5191665  
434.1579@5.428917  
430.1267@5.5020833  
428.145@5.21625  
426.2598@6.6560836  
417.1547@6.2682495  
414.2465@4.1424165  
414.2048@9.778417  
410.0912@1.064  
408.2279@10.514167  
408.0139@1.2185833  
407.2239@0.8929167  
406.1095@1.2490833  
402.2479@4.5067506  
400.1135@5.3005834  
398.1344@4.7635837  
395.265@6.06125  
392.9756@1.2280834  
392.254@10.518416  
390.2384@9.761834  
388.2321@4.1616664  
388.114@4.7041664  
386.3875@7.8846664  
383.108@2.665333  
382.0877@3.1331666  
370.103@4.7745004  
369.0762@1.0321666  
368.1873@7.1790833  
364.0982@0.9744167  
361.2595@9.687501  
358.3562@6.6780834  
357.2879@8.128917  
355.2721@7.5105  
353.1023@0.9950833  
352.2226@7.1806674  
352.0259@7.73  
350.2072@7.4015846  
350.1783@9.1379175  
348.1272@0.97308326  
347.2678@7.1875005  
342.1165@0.93983334  
340.1496@5.0381665

1764.5006@0.97220004  
174.0526@7.7673335  
1732.5479@0.9392727  
166.063@7.9745  
159.0644@0.7953636  
156.0423@8.918667  
142.0997@8.927167  
142.0996@9.321833  
1401.6761@4.18575  
1290.6451@4.4958334  
1270.5599@7.4500003  
122.0367@8.054501  
1116.528@7.7673335  
1060.415@9.332833  
1048.3547@5.2801666  
1041.5045@8.921333  
1020.4203@8.918834  
1014.4129@5.5173335  
1008.4014@9.332833  
1007.5439@8.924333

339.2527@4.153333  
336.2275@9.456832  
334.2122@9.12275  
328.1739@3.9505832  
324.0824@1.7362499  
322.1398@5.9465003  
318.1442@3.6054165  
317.2931@8.652  
317.2931@10.008917  
315.278@9.2745  
315.2778@9.444415  
314.1955@3.7834167  
314.0797@6.3495  
313.0838@1.2241668  
312.2299@7.1749997  
3101.0107@0.92050004  
308.1238@8.767999  
307.2145@6.3205833  
306.0208@7.738333  
301.2983@10.141583  
301.2621@9.08825  
298.0844@6.9845004  
298.0843@7.9135833  
297.0827@1.644  
294.2198@9.126917  
294.2196@7.1750846  
293.1472@1.3235834  
292.9962@1.0489166  
292.1022@0.92874986  
290.1884@8.284751  
289.2618@8.791417  
287.2463@8.9005  
287.195@1.2795001  
284.0687@8.951667  
284.0686@6.193833  
283.0921@1.2490834  
278.225@9.763251  
2774.8728@0.9618333  
276.209@9.12  
276.2089@7.1806674  
274.9855@1.1275833  
274.1933@7.4041667  
273.2671@8.534751  
2714.9304@0.9411667

271.142@4.4930005  
269.272@6.6767497  
268.0738@7.7328324  
268.0735@5.499334  
267.0971@1.2434999  
266.1497@5.130833  
266.1131@5.43725  
264.1362@4.182333  
264.0974@8.739083  
264.045@1.0406667  
261.2304@7.238584  
259.2153@7.3654995  
259.1049@0.9358333  
256.0742@7.476167  
2553.886@0.89300007  
254.0947@7.3682494  
254.058@5.8733335  
248.1023@6.56225  
245.2354@7.0080833  
244.131@4.962333  
2432.757@0.96058327  
241.1679@5.5075836  
240.188@9.1215  
240.1473@0.97991663  
2399.7505@0.93574995  
238.0813@5.1059165  
233.1992@5.6814995  
231.1836@5.8056664  
229.2409@8.607918  
227.1888@8.32625  
226.0521@5.2964168  
2211.7683@0.89849997  
220.0728@6.2682495  
217.2041@5.4371667  
214.0094@1.2255  
212.1388@7.2525005  
2074.6638@0.93700004  
206.0569@4.771917  
2046.7427@0.90266675  
201.2093@7.049499  
201.1729@1.2131666  
199.1209@4.8339167  
194.1309@7.175167  
191.0582@3.2989168

190.1682@6.6781673  
187.0636@3.2865  
184.1075@5.2992496  
1748.5276@0.98258334  
173.1779@5.4564166  
173.0477@3.3003333  
165.0791@2.0235  
165.0672@1.216  
164.0492@1.2310001  
162.0535@0.9563334  
157.1469@8.5195  
157.0853@0.80608326  
1568.466@0.9825833  
1552.4866@0.93016666  
154.0993@7.206917  
148.1253@7.184834  
147.0534@0.91225  
145.0527@3.2934167  
144.0422@0.9910833  
141.0582@3.2934163  
1406.4102@0.9951666  
1390.4336@0.95225  
137.0471@0.93841666  
135.0545@0.94958335  
134.0232@1.2669166  
133.0375@0.93975  
132.0533@0.8791666  
131.0948@1.3442501  
129.0424@1.22425  
126.0317@0.98408335  
123.0323@1.21325  
1226.3472@1.0131665  
119.0583@0.89983326  
117.0425@0.81158334  
1158.4012@0.89024997  
115.0635@0.91641665  
115.0273@0.93291664  
113.0952@0.8005833  
112.0275@1.2214167  
109.0639@0.79791665  
1080.2686@1.0143331  
1068.2947@1.0322499  
[1064.2953@1.0295832](#)  
1048.3179@0.99366665

103.0631@0.88891655  
1026.4734@7.87775  
1026.3462@0.86249995  
102.047@2.0234997

Table S3. NO inhibition rate of different tissues of AR and HR.

| Group | Sample name | NO Inhibiton rate |              |
|-------|-------------|-------------------|--------------|
|       |             | Average           | mean±SD      |
| A     | A1          | 31.24%            | 34.46%±0.179 |
|       | A2          | 17.83%            |              |
|       | A3          | 22.84%            |              |
|       | A4          | 36.54%            |              |
|       | A5          | 68.55%            |              |
|       | A6          | 29.77%            |              |
| APe   | A1Pe        | 44.43%            | 29.63%±0.152 |
|       | A2Pe        | 49.21%            |              |
|       | A3Pe        | 14.95%            |              |
|       | A4Pe        | 23.94%            |              |
|       | A5Pe        | 12.61%            |              |
|       | A6Pe        | 32.63%            |              |
| APh   | A1Ph        | 18.50%            | 33.07%±0.112 |
|       | A2Ph        | 32.62%            |              |
|       | A3Ph        | 25.87%            |              |
|       | A4Ph        | 46.17%            |              |
|       | A5Ph        | 46.31%            |              |
|       | A6Ph        | 28.96%            |              |
| AX    | A1X         | 69.58%            | 59.85%±0.074 |
|       | A2X         | 50.66%            |              |
|       | A3X         | 60.77%            |              |
|       | A4X         | 58.69%            |              |
|       | A5X         | 66.48%            |              |
|       | A6X         | 52.92%            |              |
| HA    | H1A         | 32.50%            | 34.93%±0.079 |
|       | H2A         | 26.67%            |              |
|       | H3A         | 41.63%            |              |
|       | H4A         | 34.72%            |              |
|       | H5A         | 46.54%            |              |
|       | H6A         | 27.50%            |              |
| HPe   | H1Pe        | 39.41%            | 38.71%±0.052 |
|       | H2Pe        | 36.29%            |              |
|       | H3Pe        | 37.18%            |              |



|                  |           |        |              |
|------------------|-----------|--------|--------------|
|                  | H4Pe      | 32.69% |              |
|                  | H5Pe      | 48.18% |              |
|                  | H6Pe      | 38.48% |              |
|                  | H1Ph      | 43.70% |              |
|                  | H2Ph      | 55.49% |              |
| HPh              | H3Ph      | 64.37% | 54.39%±0.118 |
|                  | H4Ph      | 71.89% |              |
|                  | H5Ph      | 47.79% |              |
|                  | H6Ph      | 43.10% |              |
|                  | H1X       | 84.01% |              |
|                  | H2X       | 73.24% |              |
| HX               | H3X       | 91.06% | 69.32%±0.165 |
|                  | H4X       | 47.94% |              |
|                  | H5X       | 62.40% |              |
|                  | H6X       | 57.27% |              |
| Positive control | Quercetin | 30.94% | 30.94%±0.012 |
